# Supplementary material for: Preparation of Poly(ethylene glycol)@Polyurea Microcapsules Using Oil/Oil Emulsions and Their Application as Microreactors
Source: MDPI journal article supplement (doi:10.3390/polym13152566), 2021-07-31
Supplement: s1 [file s1]

## Supporting Information

### Preparation of Poly(ethylene glycol)@Polyurea Microcapsules Using Oil/Oil emulsions and their Application as Microreactors

Ahmad Zarour<sup>1</sup>, Suheir Omar<sup>1</sup> and Raed Abu-Reziq<sup>1\*</sup>

Institute of Chemistry, Casali Center of Applied Chemistry and the Center for Nanoscience and Nanotechnology, The Hebrew University of Jerusalem, Jerusalem 9190401, Israel.

\* Correspondence: Raed.Abu-Reziq@mail.huji.ac.il; Tel.: +972-2-6586097; Fax: +972-2-6585469

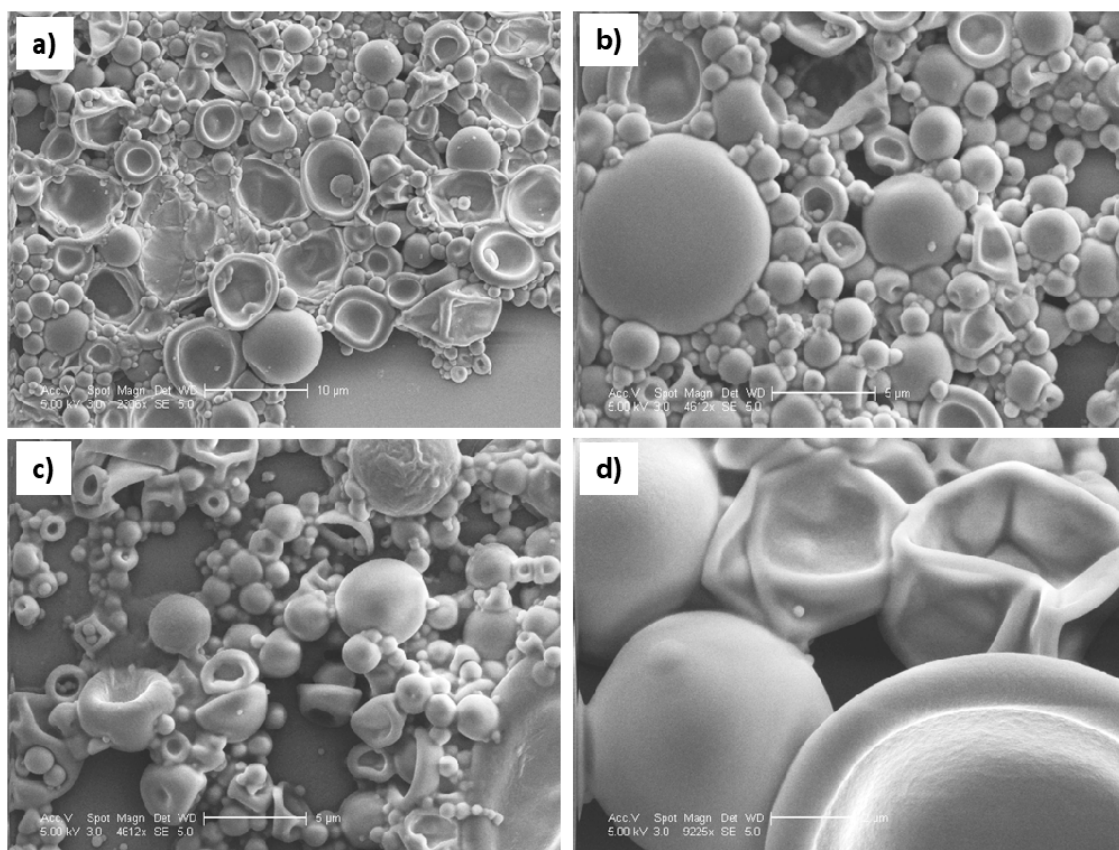

**Figure S1.** PEG<sub>200</sub>@PU MCs obtained with (a, b) ABIL EM 90 and (c, d) Agrimer AL-22 (The continuous phase is heptane, the amine is PEI and the isocyanate is TDI).

**Table S1.** PEG<sub>200</sub>@PU MCs obtained by different IFP pairs of amines and isocyanates (the continuous phase is heptane and the surfactant is ABIL EM 90).

| Interfacial polymerization pair | SEM images                                                                                                                                                                 |
|---------------------------------|----------------------------------------------------------------------------------------------------------------------------------------------------------------------------|
| PEI/TDI                         | 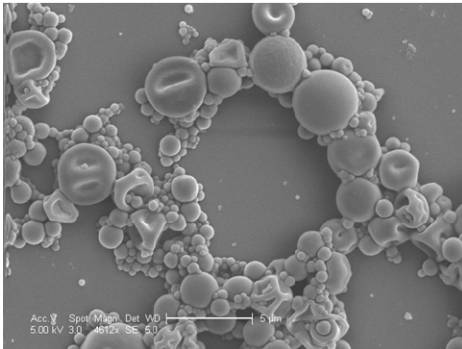    |
| DETA/TDI                        |   |

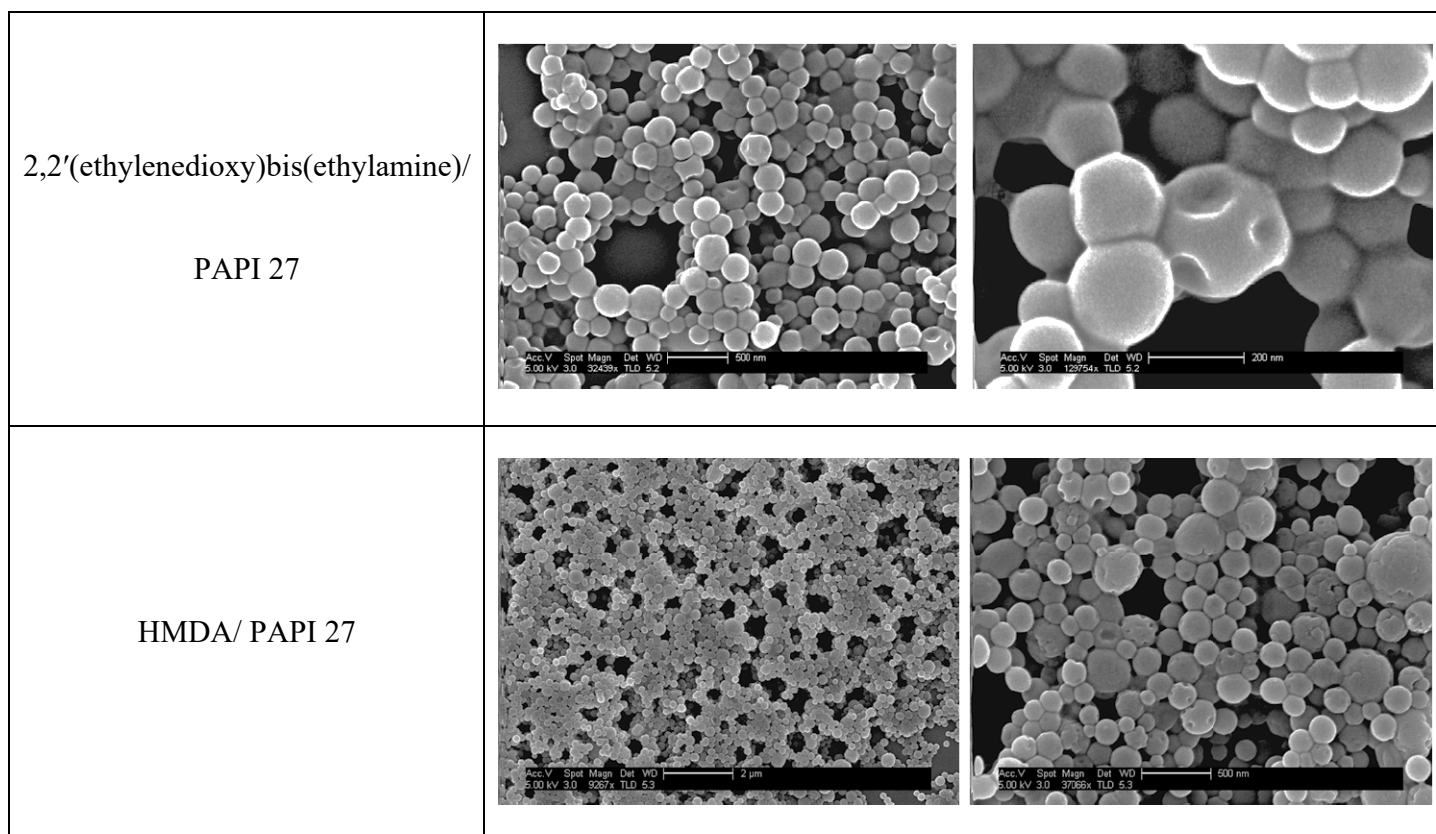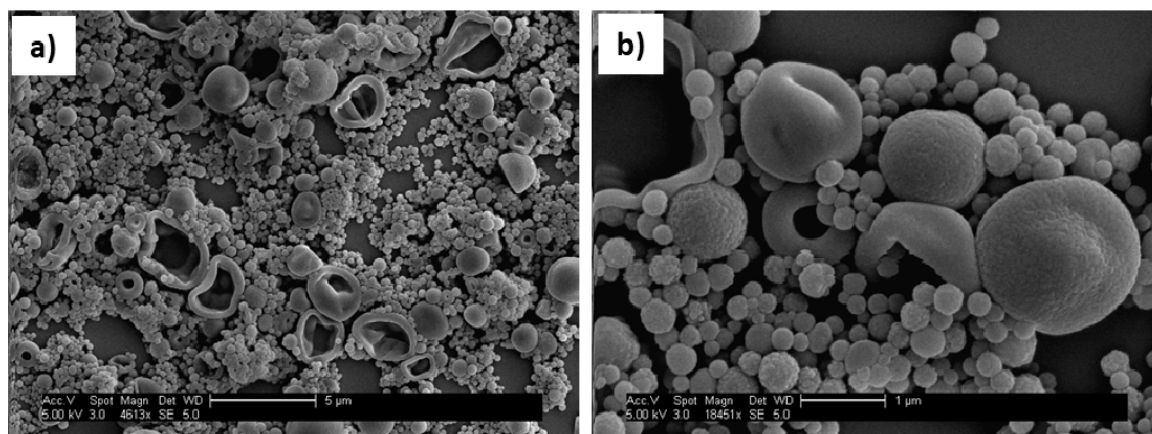

**Figure S2.** (a, b) PEG<sub>200</sub>@PU MCs obtained with cyclohexane (The surfactant is Agrimer AL-22, the amine is DETA and the isocyanate is TDI).

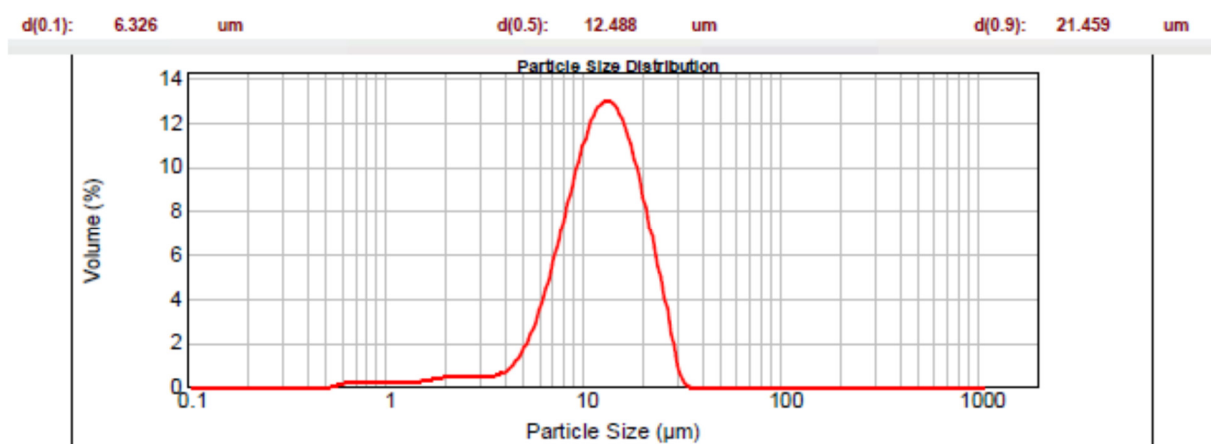

**Figure S3.** Size distribution of the PEG<sub>200</sub>@PU microcapsules dispersed in isopropyl alcohol as measured by laser diffraction size analyzer

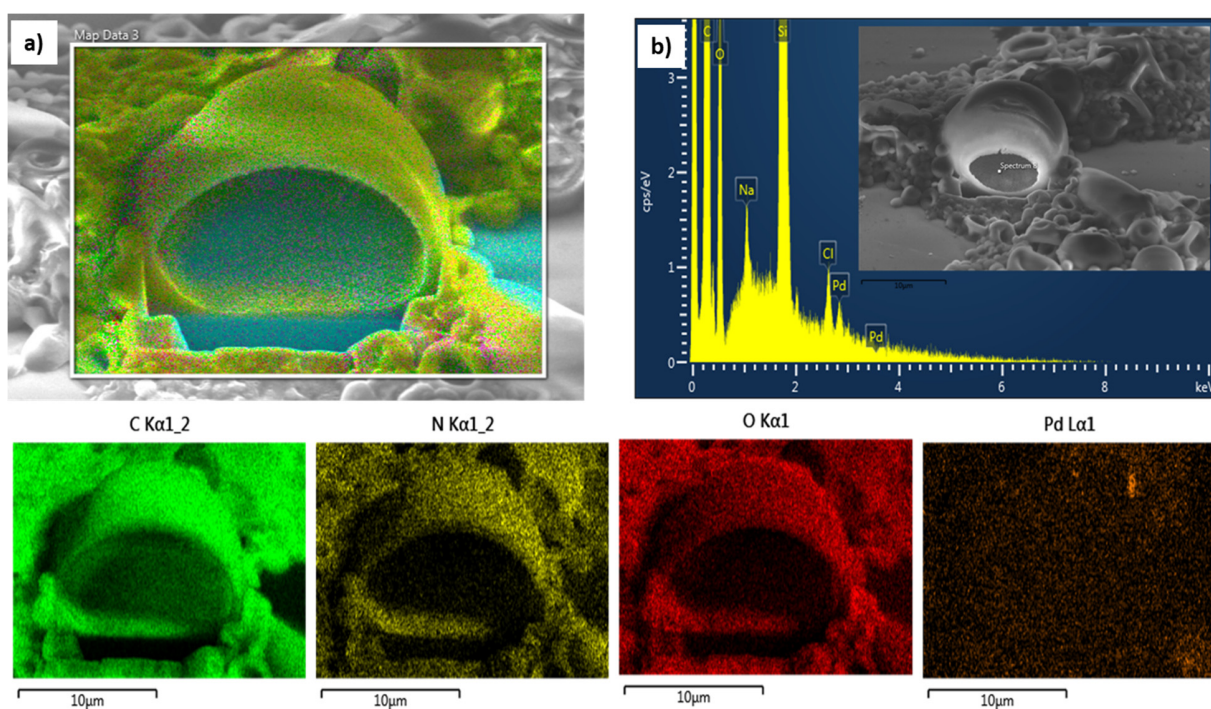

**Figure S4.** FIB-SEM (a) Mapping and (b) EDXS analyses of a cut MC.

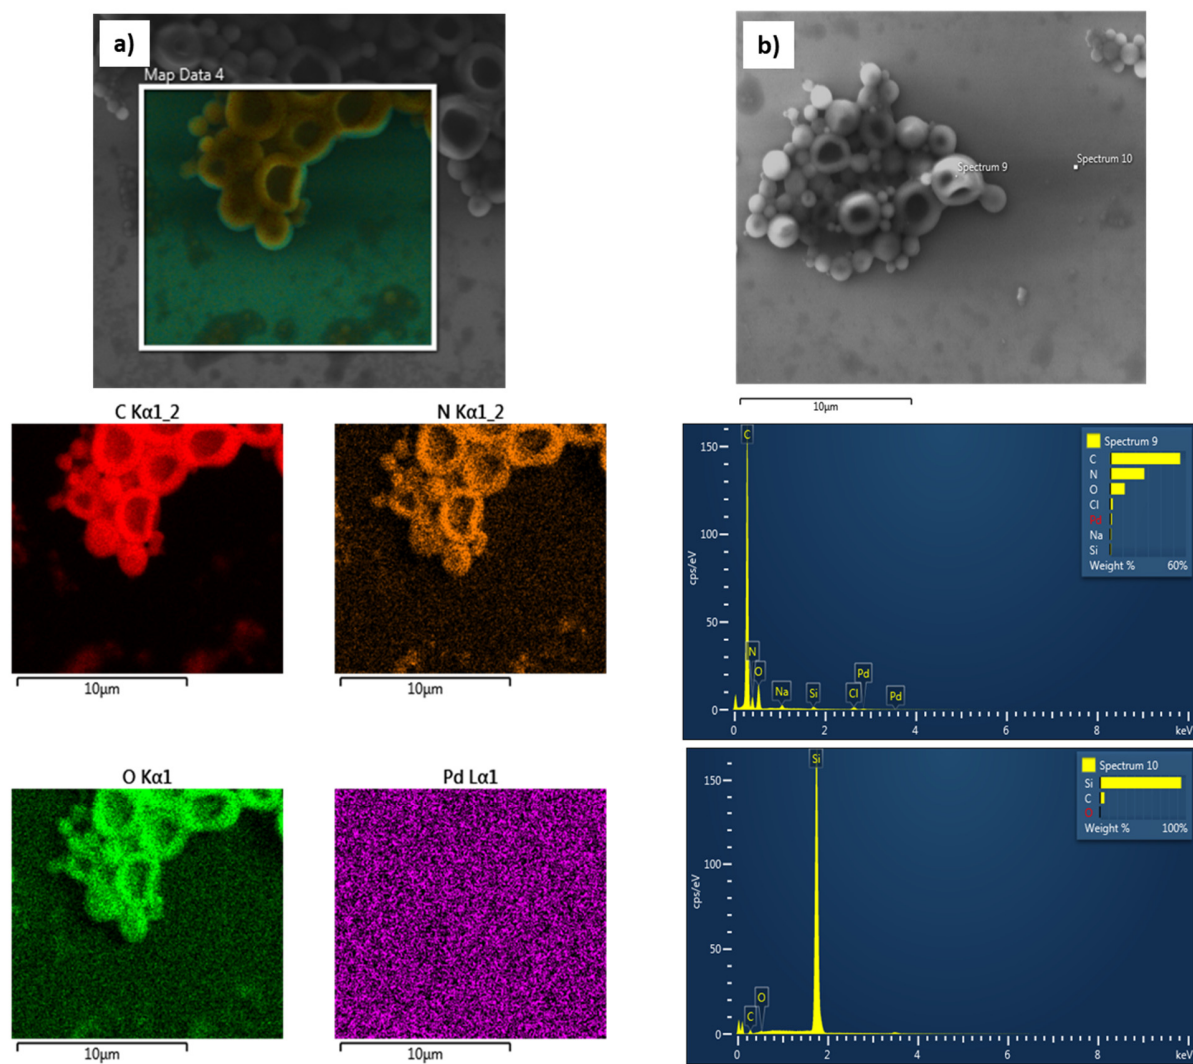

**Figure S5.** FIB-SEM applied for (a) mapping and (b) EDXS analyses of complete MCs of PdNPs/PEG<sub>200</sub>@PU.
